## A Novel Therapeutic Approach to Corneal Alkaline Burn Model by Targeting Fidgetin-like 2, a Microtubule Regulator

1 “A Novel Therapeutic Approach to Corneal Alkaline Burn Model by Targeting Fidgetin-like 2, a  
2 Microtubule Regulator”

3

4 Author List: Jessie **Wang**, MD<sup>1,2</sup>; Abhinav **Dey**, PhD<sup>2</sup>; Adam **Kramer**, PhD<sup>2</sup>; Yuan **Miao**, MD<sup>1</sup>;  
5 Juan **Liu**, MD<sup>1</sup>; Lisa **Baker**, PhD<sup>2</sup>; Joel **Friedman**, MD PhD<sup>3</sup>; Parimala **Nacharaju**, PhD<sup>3</sup>; Roy  
6 **Chuck**, MD PhD<sup>1</sup>; Cheng **Zhang**, MD\*<sup>1</sup>; David J. **Sharp**, PhD\*<sup>1,2,3</sup>

7

8 1. Department of Ophthalmology & Visual Sciences, Montefiore Medical Center, Albert  
9 Einstein College of Medicine, Bronx, NY.

10 2. MicroCures, Inc.

11 3. Department of Physiology & Biophysics, Albert Einstein College of Medicine, Bronx, NY.

12

13 \*Co-senior authors

14

### 15 **Corresponding Author:**

16 David Sharp, PhD

17 Albert Einstein College of Medicine

18 1300 Morris Park Rd

19 Bronx, NY 10461

20 david.sharp@einstein.yu.edu

21 T: (914) 462-2241

22

23 **Word Count:** 3498

## A Novel Therapeutic Approach to Corneal Alkaline Burn Model by Targeting Fidgetin-like 2, a Microtubule Regulator

24

25 **Grant:** NIH/NEI Phase 1 STTR #1R43AR1234456-01A1

26

27 **Conflict of Interest:** Dr. Wang, Dr. Kramer, Dr. Baker, and Dr. Dey are employees of  
28 MicroCures, Inc. Dr. Sharp is co-founder and Chief Scientific Officer for MicroCures, Inc and is  
29 the inventor of U.S. Patent #20130022667 entitled “Fidgetin-like 2 as a target to enhance wound  
30 healing,” which has been licensed by MicroCures. Dr. Chuck is a scientific advisor for  
31 MicroCures, Inc. Dr. Friedman holds stock in MicroCures. No other author has a conflict of  
32 interest.

33

34 **Meeting Presentation:** ARVO 2020

35

36 **Acknowledgements:** The authors would like to acknowledge Peng Guo, PhD for his help with  
37 analytical imaging.

## A Novel Therapeutic Approach to Corneal Alkaline Burn Model by Targeting Fidgetin-like 2, a Microtubule Regulator

### 38 **Abstract**

39 Purpose: To determine the efficacy of nanoparticle-encapsulated FL2 siRNA (FL2-NPsi), a  
40 novel therapeutic agent targeting the Fidgetin-like 2 (FL2) gene, for the treatment of corneal  
41 alkaline chemical injury.

42 Methods: Eighty 12-week-old, male Sprague-Dawley rats were divided evenly into 8 treatment  
43 groups: prednisolone, empty nanoparticles, control-NPsi (1  $\mu$ M, 10  $\mu$ M, 20  $\mu$ M) and FL2-NPsi  
44 (1  $\mu$ M, 10  $\mu$ M, 20  $\mu$ M). An alkaline burn was induced onto the cornea of each rat, which was  
45 then treated for 14 days according to group assignment. Clinical (N=10 per group),  
46 histopathologic (N=6 per group), and immunohistochemical (N=4 per group) analyses were  
47 conducted to assess for wound healing. FL2-NPsi-mediated knockdown of FL2 was confirmed  
48 by *in vitro* qPCR. Toxicity assays were performed to assess for apoptosis (TUNEL assay, N=3  
49 per group) and nerve damage (whole mount immunochemical staining, N=2 per group).  
50 Statistical analyses were performed using student's t-test and ANOVA.

51 Results: Compared to controls, FL2-NPsi-treated groups demonstrated enhanced corneal wound  
52 healing, with the 10 and 20  $\mu$ M FL2-NPsi-treated groups demonstrating maximum rates of  
53 corneal re-epithelialization ( $p=0.0003$  at Day 4 and  $p<0.0001$  at Day 8) as assessed by ImageJ  
54 software, enhanced corneal transparency, and improved stromal organization on histology.  
55 Immunohistochemical analysis of vascular endothelial cells, macrophages, and neutrophils did  
56 not show significant differences between treatment groups. FL2-NPsi was not found to be toxic  
57 to nerves or induce apoptosis ( $p=0.917$ ).

58 Conclusion: Dose-response studies found both 10 and 20  $\mu$ M FL2-NPsi to be efficacious in this  
59 rat model. FL2-NPsi may offer a novel treatment for corneal alkaline chemical injuries.

## A Novel Therapeutic Approach to Corneal Alkaline Burn Model by Targeting Fidgetin-like 2, a Microtubule Regulator

### 60 **Introduction**

61           There are an estimated 1.8 million cases of ocular trauma in the US every year, with burn  
62 wounds accounting for 7-18% of eye injuries presenting to emergency rooms, 84% of which are  
63 due to chemical injuries [1]. Alkaline chemical injuries oftentimes lead to poor visual outcomes  
64 due to delayed corneal re-epithelialization, persistent inflammation, and corneal ulceration and  
65 scarring [2]. Typically, they are treated with extensive flushing of the eye and topical application  
66 of corticosteroids, which target the early stages of inflammation, but have no effect on epithelial  
67 migration and interfere with corneal stroma repair, making the tradeoff often undesirable [3].

68           The corneal epithelium is the outermost layer of cells of the eye and plays an essential  
69 role in maintaining the smoothness of the optical surface and the health of the corneal stroma [4].  
70 The corneal epithelium is largely maintained through the production of cells by stem cells in the  
71 limbal corneal region. During homeostasis, centripetal migration of these newly formed corneal  
72 epithelial cells moves cells through multiple corneal zones into the central cornea, turning over  
73 the epithelium every 7 to 10 days [5]. In instances of small injuries to the cornea, adjacent  
74 epithelial cells simply spread to fill the defects [6]. Models of corneal scrapes and abrasions  
75 produce epithelial defects that are completely healed within 24-72 hours, a time course often too  
76 short for detailed comparative analysis of wound healing. However, larger corneal wounds (e.g.  
77 burns, severe trauma) cannot be covered by adjacent cells and instead require increased  
78 production and extended migration of large numbers of corneal epithelial cells from the limbus  
79 into the wound zone. Accordingly, these wounds take longer to heal, offering a valuable model  
80 for ocular wound healing studies [7-9].

81           Current therapeutics for corneal inflammatory and epithelial wound healing have focused  
82 on amniotic membranes, topical steroids, and extracellular signaling factors, with limited success

## A Novel Therapeutic Approach to Corneal Alkaline Burn Model by Targeting Fidgetin-like 2, a Microtubule Regulator

83 [10]. Small interfering RNAs (siRNA) are non-coding RNA molecules between 20-25 nucleotide  
84 in length, which interfere with the expression of target genes with complementary nucleotide  
85 sequences by degrading mRNA after transcription, preventing translation. This occurs within the  
86 RNA interference (RNAi) pathway within the cell. While small-interfering RNA (siRNA)-based  
87 therapies have shown some promise for treating a wide range of maladies, including wound  
88 closure [11-13], the effective delivery of therapeutic siRNA has proven difficult in many  
89 circumstances. siRNA is a relatively large and negatively-charged molecule, making it  
90 impermeable to cellular membranes. However, the development and refinement of siRNA  
91 delivery systems with nanoparticles is helping to circumvent this challenge [14, 15]. While  
92 previous siRNA studies have shown limited success [16, 17], the combination of new delivery  
93 platforms and the appropriate siRNA gene target could result in new ocular therapies.

94 Multiple investigations in recent years have looked into harnessing the intracellular  
95 cytoskeleton, particularly microtubules, for corneal wound healing. Hollow polymeric filaments  
96 composed of tubulin subunits, microtubules provide structural support for the cell and are an  
97 important substrate for many of the molecular motor proteins responsible for intracellular  
98 transport. Regulation of the dynamic properties of microtubules are critically important for the  
99 capacity of cells to close wounds, especially near the cell periphery. Experimental alteration of  
100 microtubule organization, dynamics, and/or posttranslational modification status has been shown  
101 to have significant effects on the migration of multiple corneal cell types both *in vitro* and *in vivo*  
102 [18-22]. Furthermore, arthritis patients treated with a drug that broadly depolymerizes  
103 microtubules display significantly reduced corneal wound healing. These data highlight both the  
104 promise of targeting microtubules to regulate wound healing and the need for a better  
105 understanding of how microtubule dynamics affect cell migration [23, 24].

## A Novel Therapeutic Approach to Corneal Alkaline Burn Model by Targeting Fidgetin-like 2, a Microtubule Regulator

106           Our previous work identified Fidgetin-like 2 (FL2) as a microtubule regulator important  
107 for cell migration. Specifically, FL2 localizes to the cell edge where it selectively severs dynamic  
108 microtubules to inhibit directional cell migration. As a result, silencing FL2 with small  
109 interfering RNA (FL2-siRNA) promotes cell motility *in vitro* and wound healing in animal  
110 models, such as dermal excision and burn wounds in mice [12, 13].

111           MT severing enzymes, which are members of the ATPases Associated with diverse  
112 cellular Activities (AAA+) superfamily, cause breakages in MTs by forming hexameric rings  
113 around the C-terminal tails of tubulin and using energy from ATP hydrolysis to pull on the tails,  
114 thereby causing tubulin dimers to dissociate from the MT lattice [25, 26]. Through their  
115 severing activity, they regulate MT length, number, and branching, and fine-tune the dynamics  
116 of the MT cytoskeleton [27]. MT severing enzymes include katanin, spastin, and the fidgetin  
117 family (fidgetin, fidgetin-like 1 (FL1), and fidgetin-like 2 (FL2)). FL2 is highly similar to  
118 canonical Fidgetin within its catalytic AAA domain but diverges elsewhere within its  
119 polypeptide sequence and is present only in vertebrates. Our previous work has demonstrated  
120 that silencing FL2 with siRNA promotes cell motility *in vitro* and wound closure in animal  
121 models [12, 13]. Here, using a dose-response study, we report that FL2 siRNA delivered via  
122 nanoparticle technology (FL2-NPsi) can promote the repair of alkali burned corneas and reduce  
123 corneal tissue edema and scarring within two weeks of injury.

## A Novel Therapeutic Approach to Corneal Alkaline Burn Model by Targeting Fidgetin-like 2, a Microtubule Regulator

### 124 **Methods**

125           The study protocol was approved by the Albert Einstein College of Medicine IACUC,  
126 and was conducted in adherence to the ARVO Statement for the Use of Animals in Ophthalmic  
127 and Vision Research.

128           Eighty 12-week old, male Sprague-Dawley rats were divided evenly into eight groups:  
129 positive control prednisolone (prednisolone acetate, Pred Forte, Allergan, Irvine, CA), empty  
130 nanoparticles, control-NPsi (1  $\mu$ M, 10  $\mu$ M, 20  $\mu$ M) and FL2-NPsi (1  $\mu$ M, 10  $\mu$ M, 20  $\mu$ M), with  
131 10 rats per group. After the animals were anesthetized with isoflurane gas and an injection of  
132 ketamine and xylazine, topical 0.5% proparacaine was applied to the right cornea before surgery.  
133 The corneal epithelium was removed with a foam tip applicator, and a chemical injury was  
134 induced on the right cornea of each rat using 4mm discs of 1M NaOH-soaked filter paper,  
135 applied directly for 10 seconds. Next, the eye was washed with 3 consecutive 10mL washes of  
136 sterile PBS. The left eye was left uninjured and untreated to serve as a negative control. The  
137 injured eye was then treated for the subsequent 14 days according to their group assignment  
138 described above, along with an antibiotic eye drop (0.3% ofloxacin, Allergan, Irvine, CA), with  
139 drops administered at least 10 minutes apart from each other to prevent washout. Nanoparticles  
140 were given every other day, as siRNA has an intracellular half-life of 24-72 hours [28], while  
141 prednisone treatments were given twice daily and antibiotic eye drops administered daily.  
142 Prednisolone acetate is known to have a half-life of 30 minutes in aqueous humor and is usually  
143 dosed at two to four times [29], while ofloxacin has a half-life of several hours, with significant  
144 concentrations still present 6-24 hours after administration [30].

145

## A Novel Therapeutic Approach to Corneal Alkaline Burn Model by Targeting Fidgetin-like 2, a Microtubule Regulator

146 *Clinical analysis:* Clinical assessment of wound healing was conducted in a blinded fashion  
147 every other day throughout the treatment period by recording digital images of corneas with a  
148 Leica EZ4 Stereo Dissecting Microscope (10447197, Heerbrugg, Switzerland) on Days 0, 2, 4, 6,  
149 8, 10, 12, and 14. After documenting the appearance of the corneas under normal lighting, the  
150 surface was stained with a drop of fluorescein solution (Fluress, Akorn Incorporated, Decatur, IL,  
151 USA), enabling visualization of the corneal epithelial defect. The areas of epithelial defect were  
152 quantified using ImageJ software and subsequently expressed as a percentage of the total corneal  
153 area. The results were recorded and assessed using the student's t-test and ANOVA (N=6 per  
154 group). Additionally, the degree of corneal opacity was scored, noting presence and degrees of  
155 hemorrhage, edema, and neovascularization (**Supplemental 1**).

156  
157 *Histopathologic analysis:* At the end of the treatment period, animals were euthanized and eyes  
158 enucleated for histopathologic evaluation (N=6 per group). Corneal tissue was embedded in  
159 paraffin, stained with hematoxylin & eosin (H&E), and cut to a thickness of 5-7  $\mu\text{m}$ . Analyses of  
160 the tissue specimens were conducted in a blinded fashion. To carry out the immunohistochemical  
161 analyses of the corneal tissues, 4 animals per group were sacrificed at 4 different time points:  
162 days 1, 3, 7, and 14. This timeline was selected because inflammatory cells such as neutrophils  
163 and macrophages are most prominent between days 2 and 4. The following antibodies were  
164 selected and tested on half of each cornea: anti-CD31 mouse monoclonal IgG1 targeting vascular  
165 endothelial cells (BioRad, Kidlington, Oxford, England), anti-Neutrophil rabbit polyclonal IgG  
166 targeting neutrophils (LifeSpan BioSciences, Seattle, WA, USA), and OX42 mouse monoclonal  
167 IgG2 targeting macrophages (Santa Cruz Biotechnology, Dallas, TX, USA). All antibodies were  
168 unconjugated and stained with a secondary, dye-conjugated antibody. Specimens were embedded



## A Novel Therapeutic Approach to Corneal Alkaline Burn Model by Targeting Fidgetin-like 2, a Microtubule Regulator

169 in paraffin and cut to a thickness of 8-10  $\mu\text{m}$ . Analysis of these specimen likewise occurred in a  
170 blinded manner.

171

172 *Toxicity analysis:* Evaluation for toxicity was performed to assess for apoptosis and nerve  
173 damage. To assess for apoptosis, 9 male Sprague-Dawley rats, one rat per group  
174 (uninjured/untreated, prednisone, empty NP, control-NPsi at 1  $\mu\text{M}$ , 10  $\mu\text{M}$ , or 20  $\mu\text{M}$ , FL2-NPsi  
175 at 1  $\mu\text{M}$ , 10  $\mu\text{M}$ , 20  $\mu\text{M}$ ), were wounded and treated as described previously. At the end of  
176 treatment, animals were euthanized and eyes were collected for analysis. Corneas were trimmed  
177 around the sclerolimbal region and fixed in 4% paraformaldehyde overnight. The transferase  
178 dUTP Nick End Labeling (TUNEL) assay was performed on cryosections of rat eyes using the  
179 TUNEL apoptosis detection kit (DeadEnd Fluorometric TUNEL System; Promega, Madison, WI)  
180 according to the manufacturer's instructions. Corneal toxicity from each treatment was evaluated  
181 by determining TUNEL-positive cell density (number per square millimeter) calculated as  
182 follows: number of TUNEL-positive cells/total number of cells. Three random fields of view  
183 were taken per corneal tissue sample.

184 To assess for nerve damage, the corneas were stained with neuronal specific rabbit  
185 polyclonal BIII tubulin antibody (BioLegend, San Diego, CA). Corneas were flat mounted on  
186 slides and imaged using an EVOS FL Auto Imaging System (ThermoFisher, Waltham, MA).  
187 Innervation of the cornea was defined as tortuous nerve endings organized in a clustered pattern  
188 originating from a single larger nerve and extending in three dimensions. Clusters were identified  
189 and counted manually from epifluorescence images of intact and hemisected corneal whole  
190 mounts [31].

191

## A Novel Therapeutic Approach to Corneal Alkaline Burn Model by Targeting Fidgetin-like 2, a Microtubule Regulator

192 *siRNA nanoparticle synthesis:* Nanoparticles were prepared as follows [12] : 500  $\mu$ l of  
193 Tetramethyl orthosilicate (TMOS) was hydrolyzed in the presence of 100  $\mu$ l of 1 mM HCl by  
194 sonication on ice for about 15 min, until a single phase formed. The hydrolyzed TMOS (100  $\mu$ l)  
195 was added to 900  $\mu$ l of 10  $\mu$ M of pooled siRNA against rat FL2 (siRNA from Sigma-Aldrich (St  
196 Louis, MO): SASI\_Rn02\_00314854; SASI\_Rn02\_00314854; SASI\_Rn02\_00389576) or the  
197 negative control siRNA (Sigma, Universal Negative control B) solution containing 10 mM  
198 phosphate, pH 7.4. A gel was formed within 10 minutes. The gel was frozen at  $-80^{\circ}\text{C}$  for 15  
199 minutes and lyophilized. The dried sample was ground into a fine powder with a mortar and  
200 pestle. The nanoparticles were then resuspended in sterile PBS at an siRNA concentration of 1,  
201 10, and 20  $\mu$ M, and stored at  $-80^{\circ}\text{C}$  until immediately before use.

202  
203 *qPCR:* For cell culture experiments, RNA was extracted with Trizol (Fisher, Hampton, NH) by  
204 standard protocol. 200-300 ng of RNA was reverse transcribed using the SSVilo IV kit  
205 (Invitrogen, Carlsbad, CA). PowerSYBR Green Master Mix (Invitrogen, Carlsbad, CA) was used  
206 for qPCR, using the 7300 Real-Time PCR system (Applied Biosystems); rat *Figl2*:  
207 GAGTTGCTGCAGTGTGAATG and CTCTGTGCTTCTGTCTCTGT; rat  $\beta$ -*actin*:  
208 CGTTGACATCCGTAAGACC (sense), TCTCCTTCTGCATCCTGTCA (antisense). Results  
209 were quantified using the comparative  $2^{-\Delta\Delta\text{Ct}}$  method. For B35 cells, experiment was performed  
210 three times.

211  
212 *Statistical analysis:* All data analysis in this study was carried out using GraphPad Prism 6 or  
213 Microsoft Excel (version 16.16.18). The samples and animals were allocated to experimental  
214 groups and processed randomly. All *in vitro* experiments represented multiple independent

## A Novel Therapeutic Approach to Corneal Alkaline Burn Model by Targeting Fidgetin-like 2, a Microtubule Regulator

215 experiments conducted in triplicate. The *in vivo* experiments were performed with 2 to 6 rats for  
216 each condition. All data are represented as means  $\pm$  SEM. Statistical analyses for the above  
217 characteristics were performed using the unpaired Student's t-test (for comparing two  
218 distributions) and one-way ANOVA for more than two distribution. Differences were considered  
219 statistically significant at a p-value of  $<0.05$ .

220

## A Novel Therapeutic Approach to Corneal Alkaline Burn Model by Targeting Fidgetin-like 2, a Microtubule Regulator

### 221 **Results**

222 Alkaline chemical injuries were induced onto the right cornea of rats, which were  
223 subsequently treated with prednisolone, empty nanoparticles, control-NPsi (1  $\mu$ M, 10  $\mu$ M, 20  
224  $\mu$ M) and FL2-NPsi (1  $\mu$ M, 10  $\mu$ M, 20  $\mu$ M). FL2-NPsi-treated groups demonstrated significantly  
225 greater corneal re-epithelialization rates when compared to the prednisone and their respective  
226 control concentration groups (**Figure 1 & Table 1**). Specifically, 10 and 20  $\mu$ M FL2-NPsi were  
227 determined to be the most efficacious concentrations in reducing time to corneal re-  
228 epithelialization throughout the healing process.

229 The degree of corneal opacity was scored from a scale of 0-4 (**Supplemental 1**). The  
230 prednisone, empty NP, 1 $\mu$ M control-NPsi, 10 $\mu$ M control-NPsi, 20 $\mu$ M control-NPsi groups scored  
231 between 3 and 4 across all eyes. The 1  $\mu$ M, 10  $\mu$ M FL2-NPsi and 20  $\mu$ M FL2-NPsi groups,  
232 however, scored between 1 and 2. When comparing control and FL2 treatment groups by  
233 concentration, the 20  $\mu$ M FL2-NPsi-treated eyes demonstrated significantly decreased opacity  
234 with less peripheral neovascularization and central edema when compared to those treated with  
235 20  $\mu$ M of control-NPsi (**Figure 2**). However, the 10  $\mu$ M and 1  $\mu$ M FL2-NPsi groups were not  
236 significantly different from their control-NPsi counterparts.

237 After 14 days, all layers of corneal tissue were compared in a blinded fashion, including  
238 for epithelial healing (structure and organization), arrangement of stromal collagen lamellae, and  
239 presence of edema, inflammatory cells, and vascularization. Histopathologic analysis by a  
240 blinded ocular pathologist using a scoring system of 0-4+, with 0 being absent and 4+ being most  
241 severe, revealed 2-3+ stromal edema, inflammation, and neovascularization and 2+ retrocorneal  
242 membrane in control groups. In contrast, the FL2-NPsi-treated population exhibited fewer  
243 inflammatory cells and less neovascularization, with stromal edema, inflammation, and

## A Novel Therapeutic Approach to Corneal Alkaline Burn Model by Targeting Fidgetin-like 2, a Microtubule Regulator

244 neovascularization scored as 1-2+ in the absence of retrocorneal membranes. The 10  $\mu$ M FL2-  
245 NPsi group exhibited 2+ stromal edema, inflammation, and neovascularization but absence of  
246 anterior chamber inflammation, suggesting mild improvement compared to the aforementioned  
247 groups. Still, it was less efficacious than the 20  $\mu$ M FL2-NPsi group, which yielded 1-2+ stromal  
248 edema, inflammation, and neovascularization with absence of anterior chamber inflammation  
249 (**Figure 3**).

250 As there is less tissue in the wounded zone, confirming knockdown *in vivo* proved to be  
251 technically difficult. There is no reliable antibody against the rat homolog of FL2, so Western  
252 blotting to confirm KD was not an option. For these reasons and despite multiple attempts,  
253 confirming knockdown *in vivo* was not achieved. FL2-NPsi induced knockdown was however  
254 confirmed *in vitro* using B35 rat neuroblastoma cells (**Supplemental 2**).

255 Lastly, preliminary toxicology studies using quantitative microscopy suggest that alkaline  
256 chemical injuries are deleterious to corneal nerves, but FL2-NPsi is not. In fact, the 10  $\mu$ M and  
257 20  $\mu$ M FL2-NPsi-treated groups had a greater number of nerve clusters as compared to control  
258 and untreated groups, demonstrating a similar profile to the uninjured/untreated negative control  
259 cornea (**Figure 4**), while empty nanoparticle and control-NPsi-treated groups demonstrated  
260 significantly reduced nerve densities. In addition, there was not a statistically significant  
261 difference in the number of apoptotic cells between prednisone, control, or FL2-NPsi-treated  
262 groups on the TUNEL assay ( $p=0.917$ ; **Figure 5**), suggesting that FL2-NPsi is not toxic to  
263 corneal tissues.

## A Novel Therapeutic Approach to Corneal Alkaline Burn Model by Targeting Fidgetin-like 2, a Microtubule Regulator

### 264 **Discussion**

265           In recent years, there have been multiple investigations into harnessing the intracellular  
266 cytoskeleton, particularly microtubules, in tissue repair. Along with their structural role,  
267 microtubules are an important substrate for many of the molecular motor proteins responsible for  
268 intracellular transport. Regulation of the dynamic properties of microtubules are critically  
269 important (especially near the cell periphery) for the capacity of cells to close wounds. Our  
270 previous work screening biological agents for cell migration phenotypes identified a novel  
271 regulator of the microtubule cytoskeleton, termed Fidgetin-like 2 (FL2), as an important negative  
272 regulator of cell migration[12]. siRNA-mediated depletion of FL2 results in a significant  
273 increase in the velocity and directionality of cells *in vitro* [12]. Moreover, we found that *in vivo*  
274 depletion of FL2 strongly promoted wound closure and repair [12, 13]. FL2 depletion enhanced  
275 healing by inducing a targeted, transient disruption of cortical microtubules within the leading  
276 edge of cells [12]. Charafeddine *et al* (2015) translated these basic cell biology findings into an  
277 *in vivo* murine model of wound healing using a nanoparticle formulation to deliver siRNA to  
278 wounded skin. Here, we applied the same core nanoparticle technology to enhance corneal repair.

279           Exposure of the cornea to alkaline solutions, particularly ammonia, can result in near  
280 immediate damage to the corneal basement membrane, stromal keratocytes and nerve endings,  
281 endothelium, lens epithelium, and vascular endothelium of the conjunctiva, episclera, iris, and  
282 ciliary body. The penetration of ammonia can cause saponification of cell membranes leading to  
283 cell death, hydration of glycosaminoglycans leading to reduced stromal clarity, hydration of  
284 collagen fibrils leading to alterations of the trabecular meshwork, and the release of  
285 prostaglandins [32-34]. As a result, significant inflammation typically occurs and can  
286 dramatically slow the rate of epithelial cell migration into the wound zone [35-37].

## A Novel Therapeutic Approach to Corneal Alkaline Burn Model by Targeting Fidgetin-like 2, a Microtubule Regulator

287 Recovery towards an intact corneal epithelium is noted to be the most important  
288 determinant for a favorable outcome following chemical injury [4], since its presence signals a  
289 positive feedback loop that limits the production of collagenase in the stroma after re-  
290 epithelialization, thereby maintaining corneal transparency [38-40]. Studies have demonstrated  
291 that an intact epithelium may also be critical in preventing additional rounds of inflammation.  
292 When an epithelial defect remains after seven days, a second wave of inflammation begins and  
293 persists [41, 42]. Therefore, identifying a factor that can expedite the migration of cells to reform  
294 an intact corneal epithelium can dramatically reduce inflammatory complications and improve  
295 outcomes.

296 When considering corneal re-epithelization, the 10  $\mu\text{M}$  and 20  $\mu\text{M}$  FL2-NPsi groups  
297 demonstrated the greatest rates of epithelial healing. In contrast, the 1  $\mu\text{M}$  FL2-NPsi-treated  
298 group performed worse than the 10 and 20  $\mu\text{M}$  concentrations, most likely because 1  $\mu\text{M}$  is too  
299 low a concentration to produce a significant effect on gene expression. Still, all FL2 NPsi-treated  
300 groups showed a greater rate of re-epithelialization compared to control-NPsi, empty NP, and  
301 prednisone-treated groups (**Figure 1 & Table 1**).

302 In addition to efficacy, the safety of FL2-NPsi is an important consideration for clinical  
303 translation. Interestingly, our preliminary toxicology evaluation using quantitative microscopy to  
304 assess for nerve damage found that FL2-treated corneas exhibited similar profiles to  
305 uninjured/untreated negative controls. This finding suggests that FL2 may not only be non-toxic  
306 to corneal nerves, but may also play a role in nerve restoration after alkaline chemical injury. In  
307 fact, a recent study by Baker *et al.*, found that FL2 knockdown had a neuro-restorative effect on  
308 injured cavernous nerves in a rodent model [43]. The increase in the number of nerve clusters

## A Novel Therapeutic Approach to Corneal Alkaline Burn Model by Targeting Fidgetin-like 2, a Microtubule Regulator

309 observed in the 10  $\mu$ M and 20  $\mu$ M of FL2-NPsi groups warrants further studies to assess for the  
310 possible neuro-restorative potential of this treatment (**Figure 4**).

311 The current use of siRNA to treat ocular maladies presents an area ripe for future  
312 development. Because the eye is a confined compartment and easily accessible for topical  
313 treatment, siRNA may be particularly promising [44]. Recent approaches using siRNAs to down-  
314 regulate the expression of genes associated with proliferation, fibrosis, or inflammation (e.g.  
315 CAP37, Caveolin-1, TGFB1, TGFBR2, CTGF, VEGFR1) have shown a range of promising  
316 preclinical data. However, these targeted proteins are involved in known cancer pathways,  
317 limiting clinical translation and underscoring the need to identify a new gene target [45-48].

318 In summary, rapid recruitment of epithelial cells responsible for closing wounds and  
319 stabilizing the corneal surface may be key in wound healing. By enhancing cell motility, wound  
320 healing can occur more rapidly and with high fidelity to the original tissue. This can have several  
321 profound effects on recovery, including reduced scarring, pain, risk of infection, and improved  
322 vision and restoration of corneal architecture.



## A Novel Therapeutic Approach to Corneal Alkaline Burn Model by Targeting Fidgetin-like 2, a Microtubule Regulator

### 323 **References**

- 324 1. Solano, J.J. *Ocular Burns and Chemical Injuries*. 2019 01/31/2019]; Available from:  
325 <https://emedicine.medscape.com/article/798696-clinical>.
- 326 2. Singh, P., et al., *Ocular chemical injuries and their management*. Oman journal of  
327 ophthalmology, 2013. **6**(2): p. 83-86.
- 328 3. Phillips, K., et al., *Effects of prednisolone and medroxyprogesterone on corneal wound*  
329 *healing, ulceration, and neovascularization*. Arch Ophthalmol, 1983. **101**(4): p. 640-3.
- 330 4. Wagoner, M.D., *Chemical injuries of the eye: current concepts in pathophysiology and*  
331 *therapy*. Surv Ophthalmol, 1997. **41**(4): p. 275-313.
- 332 5. Hanna, C., D.S. Bicknell, and J.E. O'Brien, *Cell turnover in the adult human eye*. Arch  
333 Ophthalmol, 1961. **65**: p. 695-8.
- 334 6. Copeland RA, N.A., and CH Dohlman, *Copeland and Afshari's Principals and Practice*  
335 *of Cornea*. 2013: Jaypee-Highlights Medical Publishers, Inc. 704.
- 336 7. Anderson, C., Q. Zhou, and S. Wang, *An alkali-burn injury model of corneal*  
337 *neovascularization in the mouse*. J Vis Exp, 2014(86).
- 338 8. Bai, J.Q., H.F. Qin, and S.H. Zhao, *Research on mouse model of grade II corneal alkali*  
339 *burn*. Int J Ophthalmol, 2016. **9**(4): p. 487-90.
- 340 9. Xiao, O., et al., *Minocycline inhibits alkali burn-induced corneal neovascularization in*  
341 *mice*. PLoS One, 2012. **7**(7): p. e41858.
- 342 10. Benjamin D Ashby, Q.G.a.M.D. and Willcox\*, *Corneal Injuries and Wound Healing –*  
343 *Review of Processes and Therapies*. Austin Journal of Clinical Ophthalmology, 2014.  
344 **1**(4).

## A Novel Therapeutic Approach to Corneal Alkaline Burn Model by Targeting Fidgetin-like 2, a Microtubule Regulator

- 345 11. Turner, C.T., et al., *Delivery of Flightless I siRNA from Porous Silicon Nanoparticles*  
346 *Improves Wound Healing in Mice*. ACS Biomaterials Science & Engineering, 2016.  
347 **2**(12): p. 2339-2346.
- 348 12. Charafeddine, R.A., et al., *Fidgetin-Like 2: A Microtubule-Based Regulator of Wound*  
349 *Healing*. J Invest Dermatol, 2015. **135**(9): p. 2309-2318.
- 350 13. O'Rourke, B.P., et al., *Fidgetin-Like 2 siRNA Enhances the Wound Healing Capability of*  
351 *a Surfactant Polymer Dressing*. Advances in Wound Care, 2018. **8**(3): p. 91-100.
- 352 14. Martinez, T., et al., *In vitro and in vivo efficacy of SYL040012, a novel siRNA compound*  
353 *for treatment of glaucoma*. Mol Ther, 2014. **22**(1): p. 81-91.
- 354 15. Behlke, M.A., *Chemical modification of siRNAs for in vivo use*. Oligonucleotides, 2008.  
355 **18**(4): p. 305-19.
- 356 16. Li, Z., et al., *A new approach of delivering siRNA to the cornea and its application for*  
357 *inhibiting herpes simplex keratitis*. Curr Mol Med, 2014. **14**(9): p. 1215-25.
- 358 17. Schirotli, D., et al., *Topical Delivery of siRNA and Gene Silencing in Intact Corneal*  
359 *Epithelium Using a Modified Cell-Penetrating Peptide*. Molecular Therapy - Nucleic  
360 Acids, 2019. **17**: p. 891-906.
- 361 18. Gordon, S.R. and C.A. Staley, *Role of the cytoskeleton during injury-induced cell*  
362 *migration in corneal endothelium*. Cell Motil Cytoskeleton, 1990. **16**(1): p. 47-57.
- 363 19. Gordon, S. and R. Buxar, *Inhibition of cytoskeletal reorganization stimulates actin and*  
364 *tubulin syntheses during injury-induced cell migration in the corneal endothelium*.  
365 Journal of cellular biochemistry, 1998. **67**: p. 409-21.
- 366 20. Wang, J., A. Lin, and L. Lu, *Effect of EGF-induced HDAC6 activation on corneal*  
367 *epithelial wound healing*. Invest Ophthalmol Vis Sci, 2010. **51**(6): p. 2943-8.

## A Novel Therapeutic Approach to Corneal Alkaline Burn Model by Targeting Fidgetin-like 2, a Microtubule Regulator

- 368 21. Pothula, S., H.E. Bazan, and G. Chandrasekher, *Regulation of Cdc42 expression and*  
369 *signaling is critical for promoting corneal epithelial wound healing*. Invest Ophthalmol  
370 Vis Sci, 2013. **54**(8): p. 5343-52.
- 371 22. Minns, M.S., et al., *Purinoreceptor P2X7 Regulation of Ca(2+) Mobilization and*  
372 *Cytoskeletal Rearrangement Is Required for Corneal Reepithelialization after Injury*. Am  
373 J Pathol, 2016. **186**(2): p. 285-96.
- 374 23. Alster, Y., et al., *Delay of corneal wound healing in patients treated with colchicine*.  
375 Ophthalmology, 1997. **104**(1): p. 118-9.
- 376 24. Leibovitch, I., et al., *Corneal wound healing in a patient treated with colchicine for*  
377 *familial Mediterranean Fever (FMF)*. Rheumatology (Oxford), 2003. **42**(8): p. 1021-2.
- 378 25. Roll-Mecak, A. and F.J. McNally, *Microtubule-severing enzymes*. Curr Opin Cell Biol,  
379 2010. **22**(1): p. 96-103.
- 380 26. Roll-Mecak, A. and R.D. Vale, *Making more microtubules by severing: a common theme*  
381 *of noncentrosomal microtubule arrays?* J Cell Biol, 2006. **175**(6): p. 849-51.
- 382 27. Sharp, D.J. and J.L. Ross, *Microtubule-severing enzymes at the cutting edge*. J Cell Sci,  
383 2012. **125**(Pt 11): p. 2561-9.
- 384 28. Bartlett, D.W. and M.E. Davis, *Insights into the kinetics of siRNA-mediated gene*  
385 *silencing from live-cell and live-animal bioluminescent imaging*. Nucleic acids research,  
386 2006. **34**(1): p. 322-333.
- 387 29. Allergan, *Pred Forte 1% w/v, Eye Drops Suspension*. 2003:  
388 <https://www.medicines.org.uk/emc/product/1354/smpc>.

## A Novel Therapeutic Approach to Corneal Alkaline Burn Model by Targeting Fidgetin-like 2, a Microtubule Regulator

- 389 30. Allergan, *Product Monograph, Ocuflax*. 1994: [https://allergan-web-cdn-](https://allergan-web-cdn-prod.azureedge.net/allergancanadaspecialty/allergancanadaspecialty/media/actavis-canada-specialty/en/products/pms/2018-02-06-ocuflox-pm_en.pdf)  
390 [prod.azureedge.net/allergancanadaspecialty/allergancanadaspecialty/media/actavis-](https://allergan-web-cdn-prod.azureedge.net/allergancanadaspecialty/allergancanadaspecialty/media/actavis-canada-specialty/en/products/pms/2018-02-06-ocuflox-pm_en.pdf)  
391 [canada-specialty/en/products/pms/2018-02-06-ocuflox-pm\\_en.pdf](https://allergan-web-cdn-prod.azureedge.net/allergancanadaspecialty/allergancanadaspecialty/media/actavis-canada-specialty/en/products/pms/2018-02-06-ocuflox-pm_en.pdf).
- 392 31. Fink, D.M., et al., *Nerve growth factor regulates neurolymphatic remodeling during*  
393 *corneal inflammation and resolution*. PLoS One, 2014. **9**(11): p. e112737.
- 394 32. Grant, W.M. and H.L. Kern, *Action of alkalies on the corneal stroma*. AMA Arch  
395 Ophthalmol, 1955. **54**(6): p. 931-9.
- 396 33. Eslani, M., et al., *The ocular surface chemical burns*. J Ophthalmol, 2014. **2014**: p.  
397 196827.
- 398 34. Schrage, N.F., et al., *Eye burns: an emergency and continuing problem*. Burns, 2000.  
399 **26**(8): p. 689-99.
- 400 35. Wagoner, M.D., et al., *Polymorphonuclear neutrophils delay corneal epithelial wound*  
401 *healing in vitro*. Invest Ophthalmol Vis Sci, 1984. **25**(10): p. 1217-20.
- 402 36. Watanabe, M., et al., *Promotion of corneal epithelial wound healing in vitro and in vivo*  
403 *by annexin A5*. Invest Ophthalmol Vis Sci, 2006. **47**(5): p. 1862-8.
- 404 37. Oh, S.Y., et al., *The role of macrophage migration inhibitory factor in ocular surface*  
405 *disease pathogenesis after chemical burn in the murine eye*. Mol Vis, 2010. **16**: p. 2402-  
406 11.
- 407 38. Perry, H.D., et al., *Effect of doxycycline hyclate on corneal epithelial wound healing in*  
408 *the rabbit alkali-burn model. Preliminary observations*. Cornea, 1993. **12**(5): p. 379-82.
- 409 39. Sudbeck, B.D., et al., *Induction and repression of collagenase-1 by keratinocytes is*  
410 *controlled by distinct components of different extracellular matrix compartments*. J Biol  
411 Chem, 1997. **272**(35): p. 22103-10.

## A Novel Therapeutic Approach to Corneal Alkaline Burn Model by Targeting Fidgetin-like 2, a Microtubule Regulator

- 412 40. Inoue, M., et al., *Collagenase expression is rapidly induced in wound-edge keratinocytes*  
413 *after acute injury in human skin, persists during healing, and stops at re-epithelialization.*  
414 *J Invest Dermatol*, 1995. **104**(4): p. 479-83.
- 415 41. Paterson, C.A., R.N. Williams, and A.V. Parker, *Characteristics of polymorphonuclear*  
416 *leukocyte infiltration into the alkali burned eye and the influence of sodium citrate.* *Exp*  
417 *Eye Res*, 1984. **39**(6): p. 701-8.
- 418 42. Katzman, L.R. and B.H. Jeng, *Management strategies for persistent epithelial defects of*  
419 *the cornea.* *Saudi J Ophthalmol*, 2014. **28**(3): p. 168-72.
- 420 43. Baker, L., et al., *Fidgetin-like 2 is a novel negative regulator of axonal growth and can*  
421 *be targeted to promote functional nerve regeneration after injury.* *bioRxiv*, 2020: p.  
422 2020.03.19.999508.
- 423 44. Guzman-Aranguez, A., P. Loma, and J. Pintor, *Small-interfering RNAs (siRNAs) as a*  
424 *promising tool for ocular therapy.* *Br J Pharmacol*, 2013. **170**(4): p. 730-47.
- 425 45. Griffith, G.L., et al., *Corneal wound healing, a newly identified function of CAP37, is*  
426 *mediated by protein kinase C delta (PKCdelta).* *Invest Ophthalmol Vis Sci*, 2014. **55**(8):  
427 p. 4886-95.
- 428 46. Rhim, J.H., et al., *Caveolin-1 as a novel indicator of wound-healing capacity in aged*  
429 *human corneal epithelium.* *Mol Med*, 2010. **16**(11-12): p. 527-34.
- 430 47. Yousuf, M.A., et al., *Caveolin-1 associated adenovirus entry into human corneal cells.*  
431 *PLoS One*, 2013. **8**(10): p. e77462.
- 432 48. Saika, S., *TGF-beta signal transduction in corneal wound healing as a therapeutic target.*  
433 *Cornea*, 2004. **23**(8 Suppl): p. S25-30.

434

## A Novel Therapeutic Approach to Corneal Alkaline Burn Model by Targeting Fidgetin-like 2, a Microtubule Regulator

### 435 **Legend**

436

### 437 **Figure 1. siRNA-Mediated Depletion of FL2 Enhances Corneal Re-Epithelialization.** (A)

438 Images of fluorescein-stained eyes eight days after injury. (B) Plots showing the kinetics of  
439 corneal re-epithelialization over 10 days with prednisone (blue line), 10  $\mu$ M control-NPsi (red  
440 line), 10  $\mu$ M FL2-NPsi (green line). (C) Plots showing the kinetics of corneal re-epithelialization  
441 over 10 days with prednisone (blue line), 20  $\mu$ M control-NPsi (red line), 20  $\mu$ M FL2-NPsi (green  
442 line). Data were pooled from multiple independent assays from corneas with alkaline injuries.  
443 The data for every time point were assessed using one-way ANOVA and the levels of  
444 significance shown (\*\*\*\*= $p < 0.0001$ ; \*\*\*= $p < 0.001$ ; \*\*= $p < 0.01$ ; \*= $p < 0.05$ ; n.s., not significant).

445

### 446 **Figure 2. siRNA-Mediated Depletion of FL2 Enhances Corneal Transparency in Corneal**

447 **Tissue.** (A) Corneal appearance at Day 10 and Day 14. In the prednisone-treated group, corneal  
448 tissue is cloudy with poor central corneal healing after alkali injury. Peripheral  
449 neovascularization is extensive. In the 20  $\mu$ M control-NPsi-treated group, corneal tissue is  
450 cloudy and exhibits extensive peripheral neovascularization. Some hemorrhage is seen behind  
451 the corneal tissue. In the 20  $\mu$ M FL2-NPsi-treated group, the corneal tissue is more transparent  
452 and less edematous with less peripheral neovascularization. Central corneal tissue healing  
453 appears improved compared to prednisone and control-NPsi-treated groups. (B) Table of corneal  
454 opacity scores after 14 days.

455

### 456 **Figure 3. FL2-NPsi Treatment Stimulates Healing in the Rat Alkali Burn Injury Model.** (A)

457 Following 14 days of treatment, sections of corneal tissues were stained with H&E and examined.

## A Novel Therapeutic Approach to Corneal Alkaline Burn Model by Targeting Fidgetin-like 2, a Microtubule Regulator

458 Representative images shown for rats treated with Prednisone, 20  $\mu$ M control-NPsi, or 20  $\mu$ M  
459 FL2-NPsi. The corneal epithelium layer is poorly healed, thinned, and irregular with superficial  
460 keratinization (black arrowheads) in prednisone and control-NPsi-treated groups. The corneal  
461 stroma is extremely edematous, and collagen lamella is disorganized and infiltrated with many  
462 inflammatory cells and extensive neovascularization (white arrowheads). In the FL2-NPsi-  
463 treated group, the corneal edema is less pronounced and the epithelium is thicker and more  
464 regular compared to prednisone or control-NPsi-treated groups. The corneal stroma shows less  
465 inflammatory cell infiltration and less neovascularization. Data is representative of  $\geq 3$   
466 independent experiments. (B) Table of histopathologic scores after 14 days.

467

468 **Figure 4. Corneal Nerve Assessment Using  $\beta$ -III Tubulin Antibody.** (A) Schematic of  
469 experiment for corneal nerve assessment. Corneal samples were derived from rats  
470 treated/untreated with siRNA NPs. Whole mount corneas were imaged after staining for corneal  
471 nerve bundles. (B) Corneas stained with  $\beta$ -III tubulin antibody in corneal tissue reveal that empty  
472 NP and control-NPsi-treated eyes demonstrate similar nerve densities, while uninjured/untreated  
473 and FL2-NPsi-treated eyes exhibit comparable nerve densities. Red= $\beta$ -III Tubulin. (C)  
474 Quantification of nerve clusters across treatment groups reveal that the 10  $\mu$ M and 20  $\mu$ M FL2-  
475 NPsi-treated corneas demonstrate a greater number of nerve clusters as compared to control  
476 groups, and is comparable to that of uninjured/untreated corneas.

477

478 **Figure 5. Apoptosis in Corneal Tissue Using TUNEL Assay.** (A) Prednisone, control-NPsi,  
479 and FL2-NPsi-treated corneas exhibit no statistically significant difference in the number of

## A Novel Therapeutic Approach to Corneal Alkaline Burn Model by Targeting Fidgetin-like 2, a Microtubule Regulator

480 apoptotic cells after alkaline chemical injury. n.s., not significant. (B) Apoptotic cells in  
481 prednisone, 20  $\mu$ M control-NPsi, and 20  $\mu$ M FL2-NPsi-treated corneas.

482

483 **Table 1. Percentages of Corneal Surface Area with Epithelial Defect Over 14 Days After**  
484 **Alkaline Injury.**

485

486 **Supplemental 1. Clinical Assessment of Corneal Opacity – Scoring Sheet.**

487

488 **Supplemental 2. Nanoparticle-Mediated Knockdown of FL2 in an In Vitro qPCR Assay.** A  
489 significant knockdown (49.6% of control) of FL2 was detected, illustrating the ability of the NPs  
490 to successfully deliver siRNA to cells.

491



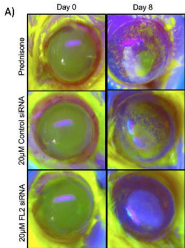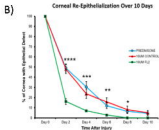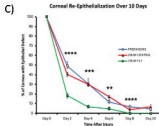

A)

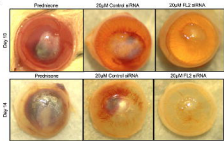

B)

### Corneal Opacity Analysis

| Treatment Group       | Opacity Score |
|-----------------------|---------------|
| <b>PREDNISONE</b>     | <b>2.67</b>   |
| EMPTY NP              | 3.17          |
| 1UM CONTROL NP-si     | 1.83          |
| 10UM CONTROL NP-si    | 2.83          |
| 20UM CONTROL NP-si    | 2.17          |
| <b>1UM FL2 NP-si</b>  | <b>1.67</b>   |
| <b>10UM FL2 NP-si</b> | <b>1.67</b>   |
| <b>20UM FL2 NP-si</b> | <b>1.17</b>   |

A)

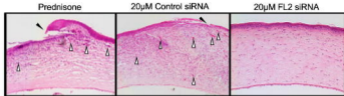

B)

| Histopathology Analysis |               |                      |                            |                                           |
|-------------------------|---------------|----------------------|----------------------------|-------------------------------------------|
| Treatment Group         | Stromal Edema | Stromal Inflammation | Stromal Neovascularization | AC inflammation/<br>Retrocorneal membrane |
| PREDNISONE              | 2.93          | 2.67                 | 3.33                       | 2.33                                      |
| EMPTY NP                | 2.75          | 2.90                 | 2.91                       | 0.83                                      |
| 10UM CONTROL NP-d       | 2.67          | 2.40                 | 2.58                       | 1.90                                      |
| 10UM CONTROL NP-d       | 2.67          | 2.58                 | 2.83                       | 0.17                                      |
| 20UM CONTROL NP-d       | 2.58          | 2.67                 | 2.67                       | 1.8                                       |
| 10UM FL2 NP-d           | 2.5           | 2.4                  | 2.5                        | 2.1                                       |
| 10UM FL2 NP-d           | 2.25          | 2                    | 2.08                       | 0                                         |
| 20UM FL2 NP-d           | 2             | 1.83                 | 1.83                       | 0                                         |

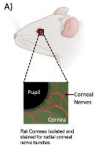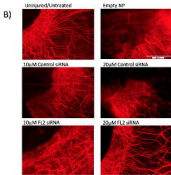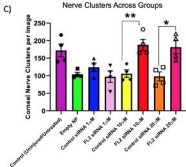

A)

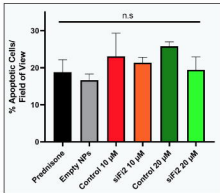

B)

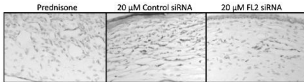

| Percentage of Cornea Surface Area with Epithelial Defect |       |       |       |       |       |        |        |        |
|----------------------------------------------------------|-------|-------|-------|-------|-------|--------|--------|--------|
| Treatment Group                                          | Day 0 | Day 2 | Day 4 | Day 6 | Day 8 | Day 10 | Day 12 | Day 14 |
| <b>PREDNISONE</b>                                        | 100%  | 49.2% | 30.4% | 11.9% | 6.5%  | 4.4%   | 0%     | 0%     |
| <b>EMPTY NP</b>                                          | 100%  | 39.1% | 21.8% | 17.0% | 7.5%  | 4.6%   | 0%     | 0%     |
| <b>1UM CONTROL NP-si</b>                                 | 100%  | 36.5% | 22.5% | 12.4% | 9.7%  | 3.9%   | 0%     | 0%     |
| <b>10UM CONTROL NP-si</b>                                | 100%  | 48.0% | 23.7% | 15.7% | 8.2%  | 5.1%   | 0%     | 0%     |
| <b>20UM CONTROL NP-si</b>                                | 100%  | 40.5% | 29.9% | 17.1% | 13.7% | 6.4%   | 0%     | 0%     |
| <b>1UM FL2 NP-si</b>                                     | 100%  | 26.8% | 12.5% | 9.8%  | 3.1%  | 0%     | 0%     | 0%     |
| <b>10UM FL2 NP-si</b>                                    | 100%  | 16.2% | 7.0%  | 2.7%  | 0.1%  | 0%     | 0%     | 0%     |
| <b>20UM FL2 NP-si</b>                                    | 100%  | 18.2% | 6.9%  | 4.9%  | 0%    | 0%     | 0%     | 0%     |
| <b>50UM FL2 NP-si</b>                                    | 100%  | 31.7% | 11.2% | 9.0%  | 7.3%  | 2.4%   | 0%     | 0%     |
